# Supplementary material for: The prevalence of burnout, risk factors and job-related stressors in gastroenterologists: a systematic review
Source: bioRxiv or medRxiv preprint supplement (doi:10.1101/2020.12.24.20248839), 2020-12-26
Supplement: Supplementary file [file media-1.pdf]

**The prevalence of burnout, risk factors and job-related stressors in gastroenterologists:  
a systematic review**

John Ong, Carla Swift, Michael Bath, Wanyen Lim, Sharon Ong, Yasseen Al-Naeeb, Arun Shankar, and Yock Young Dan

**Supplementary Information**

| <b>Contents</b> | <b>Item description</b>                    | <b>Page number</b> |
|-----------------|--------------------------------------------|--------------------|
| Appendix 1      | Systematic review search strategy          | 2 to 4             |
| Appendix 2      | Modified QATSO tool                        | 5                  |
| Supp. Figure 1  | Burnout prevalence: Forest & Funnel plots  | 6                  |
| Supp. Figure 2  | EE prevalence: Forest & Funnel plots       | 7                  |
| Supp. Figure 3  | DP prevalence: Forest & Funnel plots       | 8                  |
| Supp. Figure 4  | PA prevalence: Forest & Funnel plots       | 9                  |
| Supp. Figure 5  | Burnout in female gastroenterologists (OR) | 10                 |

## Appendix 1: Systematic review search strategy

"Term 1" AND "Term 2" (AND "Term 3" where indicated)

Period: From inception to 1 September 2020

| Search | Term 1               | Term 2              | Term 3 |
|--------|----------------------|---------------------|--------|
| 1      | Burn out             | Gastroenterology    | -      |
| 2      | Burn out             | Gastroenterologists | -      |
| 3      | Burn out             | Endoscopy           | -      |
| 4      | Burn out             | Endoscopists        | -      |
| 5      | Burn out             | Gastrointestinal    | -      |
| 6      | Burn out             | GI                  | -      |
| 7      | Burn out             | Hepatology          | -      |
| 8      | Burn out             | Hepatologists       | -      |
| 9      | Burnout              | Gastroenterology    | -      |
| 10     | Burnout              | Gastroenterologists | -      |
| 11     | Burnout              | Endoscopy           | -      |
| 12     | Burnout              | Endoscopists        | -      |
| 13     | Burnout              | Gastrointestinal    | -      |
| 14     | Burnout              | GI                  | -      |
| 15     | Burnout              | Hepatology          | -      |
| 16     | Burnout              | Hepatologists       | -      |
| 17     | Burned out           | Gastroenterology    | -      |
| 18     | Burned out           | Gastroenterologists | -      |
| 19     | Burned out           | Endoscopy           | -      |
| 20     | Burned out           | Endoscopists        | -      |
| 21     | Burned out           | Gastrointestinal    | -      |
| 22     | Burned out           | GI                  | -      |
| 23     | Burned out           | Hepatology          | -      |
| 24     | Burned out           | Hepatologists       | -      |
| 25     | Burnt out            | Gastroenterology    | -      |
| 26     | Burnt out            | Gastroenterologists | -      |
| 27     | Burnt out            | Endoscopy           | -      |
| 28     | Burnt out            | Endoscopists        | -      |
| 29     | Burnt out            | Gastrointestinal    | -      |
| 30     | Burnt out            | GI                  | -      |
| 31     | Burnt out            | Hepatology          | -      |
| 32     | Burnt out            | Hepatologists       | -      |
| 33     | Emotional exhaustion | Gastroenterology    | -      |
| 34     | Emotional exhaustion | Gastroenterologists | -      |
| 35     | Emotional exhaustion | Endoscopy           | -      |
| 36     | Emotional exhaustion | Endoscopists        | -      |
| 37     | Emotional exhaustion | Gastrointestinal    | -      |

|    |                         |                     |          |
|----|-------------------------|---------------------|----------|
| 38 | Emotional exhaustion    | GI                  | -        |
| 39 | Emotional exhaustion    | Hepatology          | -        |
| 40 | Emotional exhaustion    | Hepatologists       | -        |
| 41 | Depersonalisation       | Gastroenterology    | -        |
| 42 | Depersonalisation       | Gastroenterologists | -        |
| 43 | Depersonalisation       | Endoscopy           | -        |
| 44 | Depersonalisation       | Endoscopists        | -        |
| 45 | Depersonalisation       | Gastrointestinal    | -        |
| 46 | Depersonalisation       | GI                  | -        |
| 47 | Depersonalisation       | Hepatology          | -        |
| 48 | Depersonalisation       | Hepatologists       | -        |
| 49 | Cynicism                | Gastroenterology    | -        |
| 50 | Cynicism                | Gastroenterologists | -        |
| 51 | Cynicism                | Endoscopy           | -        |
| 52 | Cynicism                | Endoscopists        | -        |
| 53 | Cynicism                | Gastrointestinal    | -        |
| 54 | Cynicism                | GI                  | -        |
| 55 | Cynicism                | Hepatology          | -        |
| 56 | Cynicism                | Hepatologists       | -        |
| 57 | Professional efficacy   | Gastroenterology    | -        |
| 58 | Professional efficacy   | Gastroenterologists | -        |
| 59 | Professional efficacy   | Endoscopy           | -        |
| 60 | Professional efficacy   | Endoscopists        | -        |
| 61 | Professional efficacy   | Gastrointestinal    | -        |
| 62 | Professional efficacy   | GI                  | -        |
| 63 | Professional efficacy   | Hepatology          | -        |
| 64 | Professional efficacy   | Hepatologists       | -        |
| 65 | Personal accomplishment | Gastroenterology    | -        |
| 66 | Personal accomplishment | Gastroenterologists | -        |
| 67 | Personal accomplishment | Endoscopy           | -        |
| 68 | Personal accomplishment | Endoscopists        | -        |
| 69 | Personal accomplishment | Gastrointestinal    | -        |
| 70 | Personal accomplishment | GI                  | -        |
| 71 | Personal accomplishment | Hepatology          | -        |
| 72 | Personal accomplishment | Hepatologists       | -        |
| 73 | Stress                  | Gastroenterology    | Burn out |
| 74 | Stress                  | Gastroenterologists | Burn out |
| 75 | Stress                  | Endoscopy           | Burn out |
| 76 | Stress                  | Endoscopists        | Burn out |
| 77 | Stress                  | Gastrointestinal    | Burn out |
| 78 | Stress                  | GI                  | Burn out |
| 79 | Stress                  | Hepatology          | Burn out |
| 80 | Stress                  | Hepatologists       | Burn out |
| 81 | Stress                  | Gastroenterology    | Burnout  |
| 82 | Stress                  | Gastroenterologists | Burnout  |
| 83 | Stress                  | Endoscopy           | Burnout  |

|     |           |                     |            |
|-----|-----------|---------------------|------------|
| 84  | Stress    | Endoscopists        | Burnout    |
| 85  | Stress    | Gastrointestinal    | Burnout    |
| 86  | Stress    | GI                  | Burnout    |
| 87  | Stress    | Hepatology          | Burnout    |
| 88  | Stress    | Hepatologists       | Burnout    |
| 89  | Stress    | Gastroenterology    | Burned out |
| 90  | Stress    | Gastroenterologists | Burned out |
| 91  | Stress    | Endoscopy           | Burned out |
| 92  | Stress    | Endoscopists        | Burned out |
| 93  | Stress    | Gastrointestinal    | Burned out |
| 94  | Stress    | GI                  | Burned out |
| 95  | Stress    | Hepatology          | Burned out |
| 96  | Stress    | Hepatologists       | Burned out |
| 97  | Stressors | Gastroenterology    | Burn out   |
| 98  | Stressors | Gastroenterologists | Burn out   |
| 99  | Stressors | Endoscopy           | Burn out   |
| 100 | Stressors | Endoscopists        | Burn out   |
| 101 | Stressors | Gastrointestinal    | Burn out   |
| 102 | Stressors | GI                  | Burn out   |
| 103 | Stressors | Hepatology          | Burn out   |
| 104 | Stressors | Hepatologists       | Burn out   |
| 105 | Stressors | Gastroenterology    | Burnout    |
| 106 | Stressors | Gastroenterologists | Burnout    |
| 107 | Stressors | Endoscopy           | Burnout    |
| 108 | Stressors | Endoscopists        | Burnout    |
| 109 | Stressors | Gastrointestinal    | Burnout    |
| 110 | Stressors | GI                  | Burnout    |
| 111 | Stressors | Hepatology          | Burnout    |
| 112 | Stressors | Hepatologists       | Burnout    |
| 113 | Stressors | Gastroenterology    | Burned out |
| 114 | Stressors | Gastroenterologists | Burned out |
| 115 | Stressors | Endoscopy           | Burned out |
| 116 | Stressors | Endoscopists        | Burned out |
| 117 | Stressors | Gastrointestinal    | Burned out |
| 118 | Stressors | GI                  | Burned out |
| 119 | Stressors | Hepatology          | Burned out |
| 120 | Stressors | Hepatologists       | Burned out |

## Appendix 2: Modified QATSO Tool

| S/N | Criteria                                                                                                                                                                                                                                                                                                                                                                                                                                                                     | Scores                              |
|-----|------------------------------------------------------------------------------------------------------------------------------------------------------------------------------------------------------------------------------------------------------------------------------------------------------------------------------------------------------------------------------------------------------------------------------------------------------------------------------|-------------------------------------|
| 1   | <p style="text-align: center;">Was the sampling method representative of the population intended to the study?</p> <p style="margin-left: 40px;">A. Non-probability sampling (including: purposive, quota , convenience and snowball sampling)</p> <p style="margin-left: 40px;">B. Probability sampling (including: simple random, systematic, stratified g, cluster, two-stage and multi-stage sampling)</p>                                                               | <p>0</p> <p>1</p>                   |
| 2   | <p style="text-align: center;">Were the measurement of burnout, frequency of abnormal symptoms in the study population, or related stressors reported?</p> <p style="margin-left: 40px;">A. Burnout prevalence</p> <p style="margin-left: 40px;">B. Frequency of burnout symptoms</p> <p style="margin-left: 40px;">C. Stressors related burnout</p> <p style="margin-left: 40px;">D. None of the above reported</p>                                                         | <p>1</p> <p>1</p> <p>1</p> <p>0</p> |
| 3   | <p style="text-align: center;">Did the study report any response rate? (If the reported response rate is below 60%, the question should be answered “No”.)</p> <p style="margin-left: 40px;">A. No</p> <p style="margin-left: 40px;">B. Yes</p>                                                                                                                                                                                                                              | <p>0</p> <p>1</p>                   |
| 4   | <p style="text-align: center;">Did the investigator(s) control for confounding factors (e.g. stratification/ matching/ restriction/ adjustment) when analyzing the associations (if the study contains purely descriptive results, no association and prediction tests were conducted in the test, please select “Not applicable”)?</p> <p style="margin-left: 40px;">A. No</p> <p style="margin-left: 40px;">B. Yes</p> <p style="margin-left: 40px;">C. Not applicable</p> | <p>0</p> <p>1</p> <p>N/A</p>        |

Scoring method: Total score divided by total number of all applicable items

Grading of the modified QATSO score:

|         |              |           |
|---------|--------------|-----------|
| 0% -33% | 33%- 66%     | 67% -100% |
| Poor    | Satisfactory | Good      |

Studies scoring 33% or lower (score  $\leq$  2) were excluded from meta-analysis.

**Supplementary Figure 1 - Meta-analyses of Burnout Prevalence in Gastroenterologists**

(A)

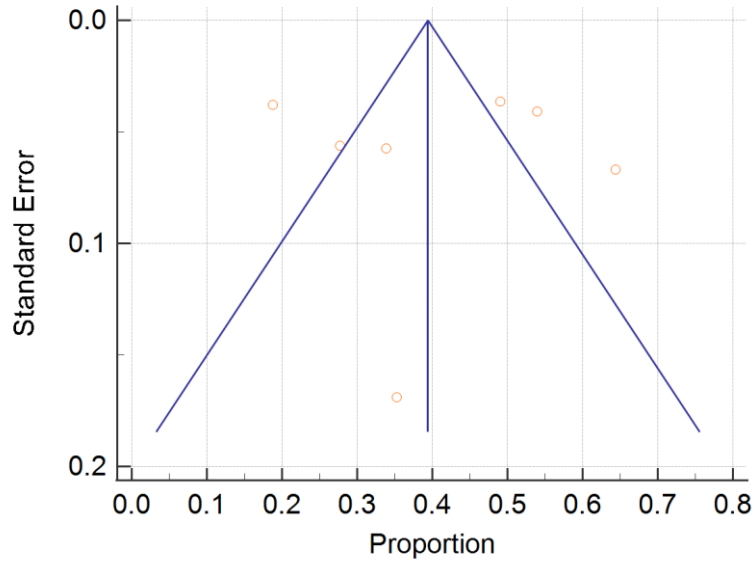

(B)

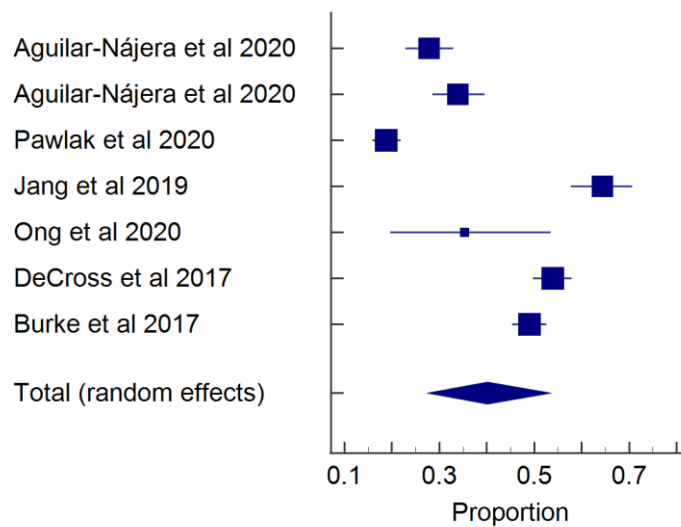

**Cochrane Q = 305.1, df = 6, p < 0.0001**

**I<sup>2</sup> = 98.0% (95% CI: 97.2% to 98.6%)**

**Pooled prevalence = 40.1% (95% CI: 27.4% to 53.6%)**

**Egger's test: p = 0.88, Begg's test: p = 0.65**

Supplementary Figure 1: (A) Funnel plot and (B) Forrest plot of studies reporting burnout prevalence in gastroenterologists.

**Supplementary Figure 2: Prevalence of emotional exhaustion (EE) in gastroenterologists.**

(A)

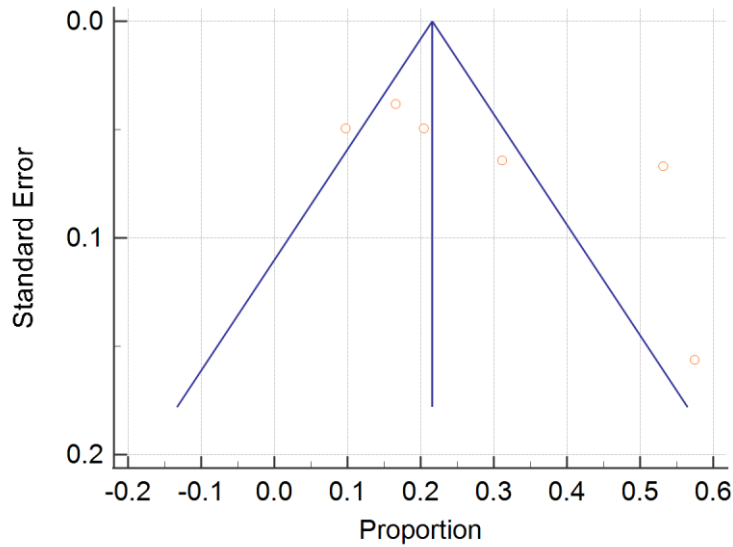

(B)

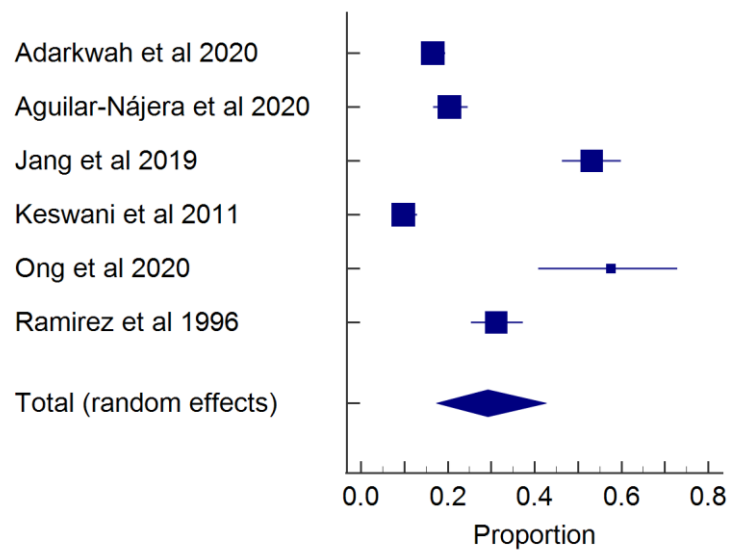

**Cochrane Q = 189.5, df = 5, p < 0.0001**

**I<sup>2</sup> = 97.4% (95% CI: 95.9% to 98.3%)**

**Pooled prevalence = 29.2% (95% CI: 17.4% to 42.7%)**

**Egger's test: p = 0.13, Begg's test: p = 0.09**

Supplementary Figure 2: (A) Funnel plot and (B) Forrest plot of studies reporting the prevalence of emotional exhaustion in gastroenterologists.

**Supplementary Figure 3 - Prevalence of depersonalisation (DP) in gastroenterologists.**

**(A)**

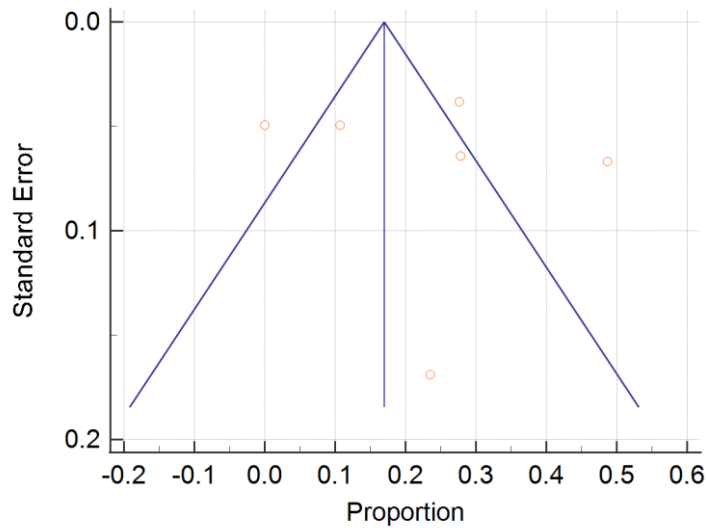

**(B)**

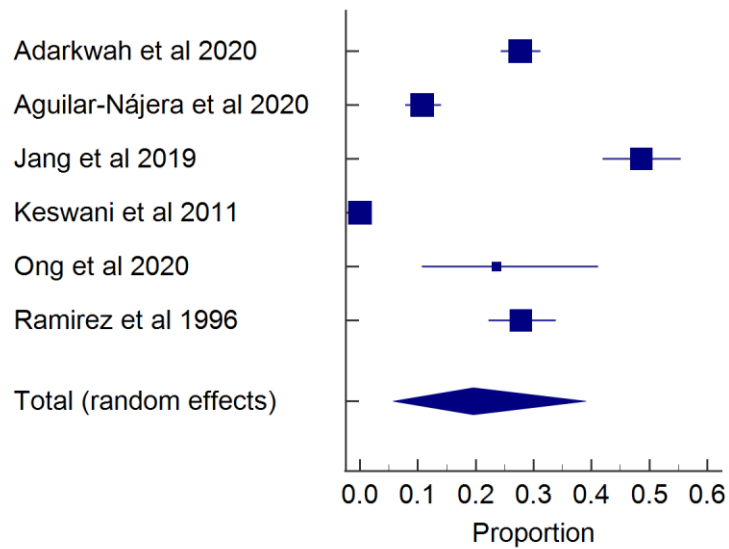

**Cochrane Q = 447.8, df = 5, p < 0.0001**

**I<sup>2</sup> = 98.9% (95% CI: 98.5% to 99.2%)**

**Pooled prevalence = 19.6% (95% CI: 5.7% to 39.0%)**

**Egger's test: p = 0.79, Begg's test: p = 0.85**

Supplementary Figure 3: (A) Funnel plot and (B) Forrest plot of studies reporting the prevalence of depersonalisation in gastroenterologists.



**Supplementary Figure 4 - Prevalence of low personal accomplishment (PA) in gastroenterologists.**

**(A)**

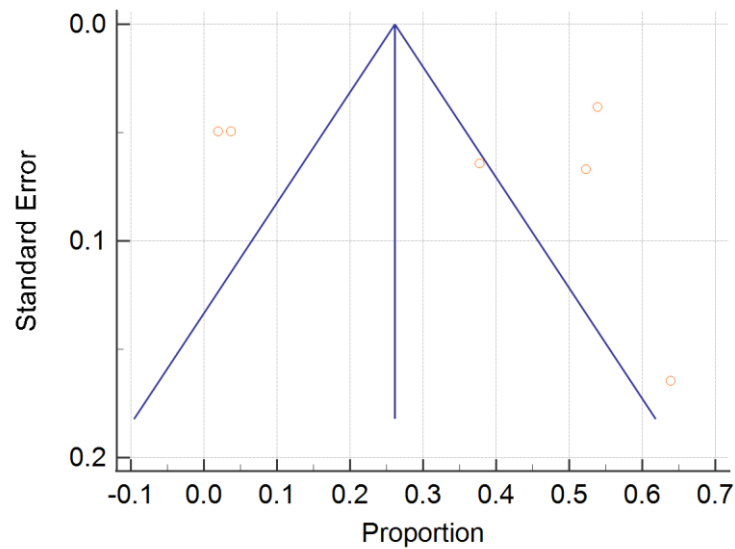

**(B)**

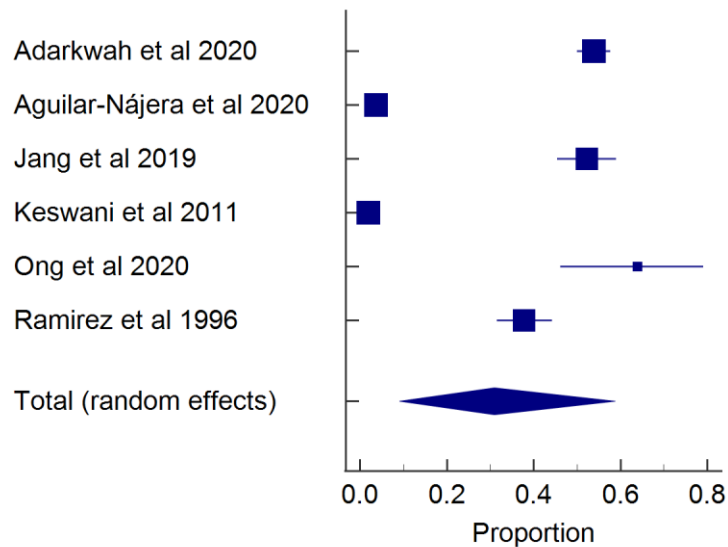

**Cochrane Q = 774.4, df = 5, p < 0.0001**

**I<sup>2</sup> = 99.4% (95% CI: 99.2% to 99.5%)**

**Pooled prevalence = 30.9% (95% CI: 9.1% to 58.8%)**

**Egger's test: p = 0.87, Begg's test: p = 0.07**

Supplementary Figure 4: (A) Funnel plot and (B) Forrester plot of studies reporting the prevalence of low personal accomplishment in gastroenterologists.

**Supplementary Figure 5 - Burnout in female gastroenterologists (Odd's Ratio)**

(A)

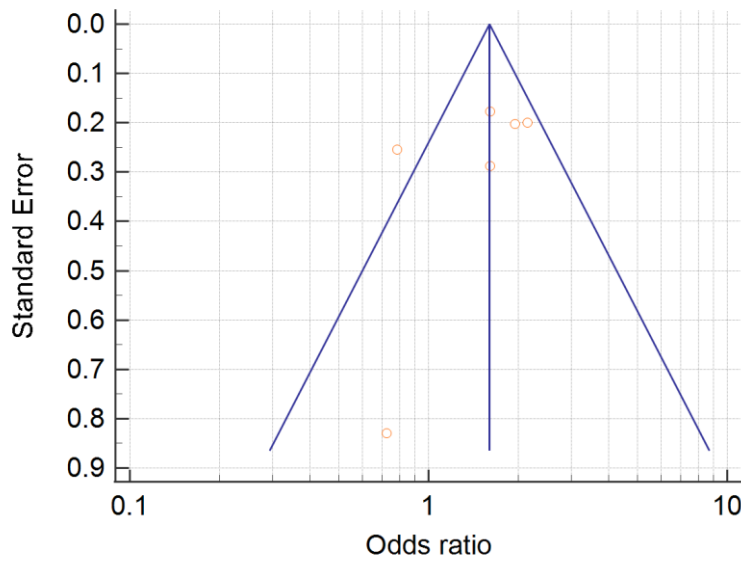

(B)

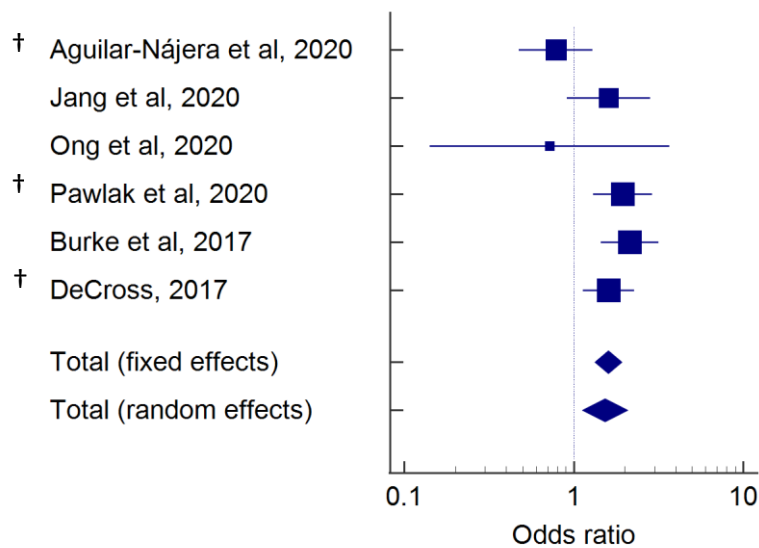

**Cochrane Q = 11.9, df = 5, p = 0.04**

**I<sup>2</sup> = 57.8% (95% CI: 0% to 82.9%)**

**Pooled Odd's Ratio (random effect) = 1.5 (95% CI: 1.1 to 2.1), p < 0.01**

**Egger's test: p = 0.36, Begg's test: p = 0.35**

Supplementary Figure 5: (A) Funnel plot and (B) Forrest plot showing Odd's Ratio of studies reporting gender-specific burnout rates in female gastroenterologists. †Additional data provided by authors through personal correspondence.
